# Supplementary material for: Chloroplast Genomes and Comparative Analyses among Thirteen Taxa within Myrsinaceae s.str. Clade (Myrsinoideae, Primulaceae)
Source: PubMed Central journal article supplement (PMC6769889; doi:10.3390/ijms20184534), 2019-09-13
Supplement: ijms-20-04534-s001.pdf [file ijms-20-04534-s001.pdf]

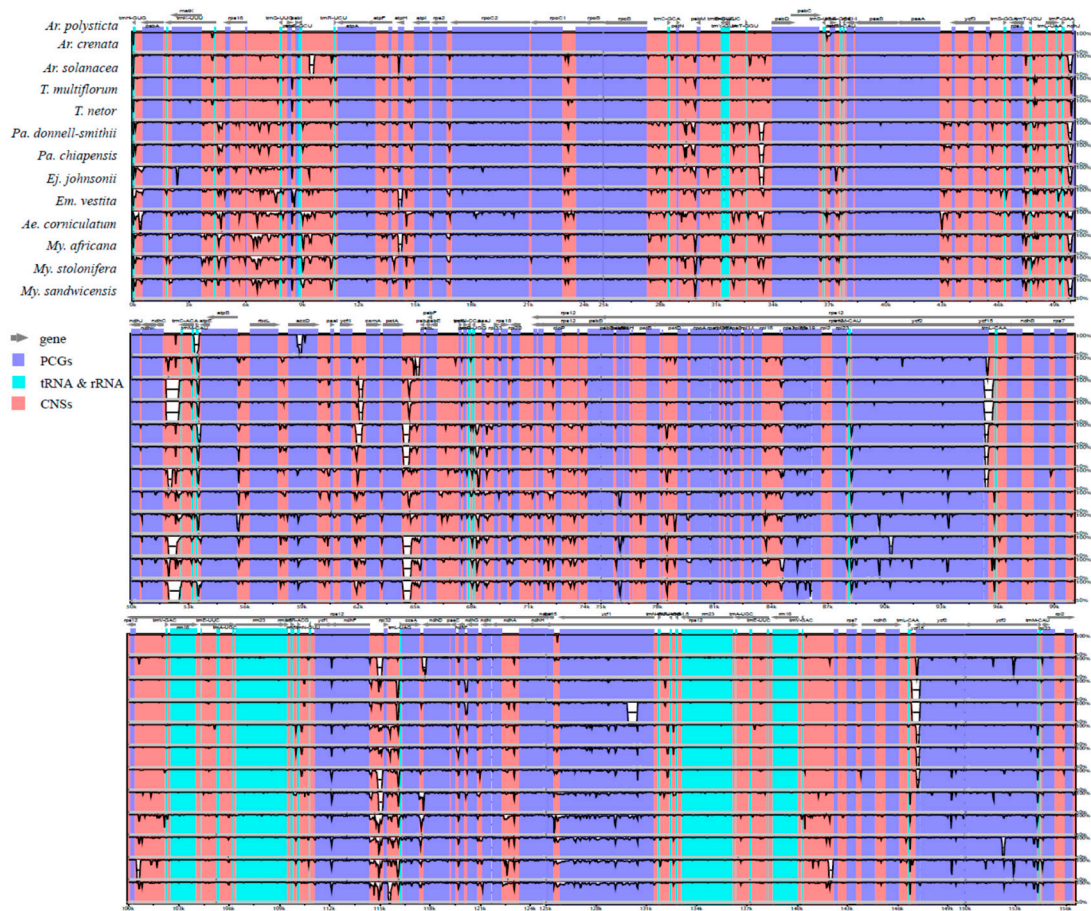

**Figure S1.** Visualization of alignment of the 13 cp genome sequences of Myrsinaceae s.str. clade. The cp genome of *Aridisa polysticta* is used as reference. Genome regions are color coded as protein-coding genes (PCGs), tRNAs and rRNAs, and conserved non-coding sequences (CNSs). The dark grey arrows indicate the annotated genes with their transcriptional direction. The percentage of identity is from 50% to 100% in vertical scale.

**Table S1.** Features of the cp genomes within the Myrsinaceae s.str. clade.

| Taxon                             | LSC size (bp) | SSC size (bp) | IR size (bp) | GC content in LSC | GC content in SSC | GC content in IRs | <i>ψaccD</i> (bp) | <i>ψycf15</i> (bp) | <i>ψinfA</i> (bp) |
|-----------------------------------|---------------|---------------|--------------|-------------------|-------------------|-------------------|-------------------|--------------------|-------------------|
| <i>Aegiceras comiculatum</i>      | 87,057        | 18,244        | 25,970       | 34.7%             | 30.1%             | 42.9%             | 1,497             | 204                | 234               |
| <i>Aridisa crenata</i>            | 86,421        | 18,347        | 26,054       | 34.9%             | 30.2%             | 43.0%             | 1,074             | -                  | 234               |
| <i>Ardisia polysticta</i>         | 86,078        | 18,328        | 26,050       | 34.9%             | 30.2%             | 43.0%             | 1,494             | 204                | 234               |
| <i>Ardisia solanacea</i>          | 86,033        | 18,093        | 26,196       | 34.9%             | 30.3%             | 43.2%             | 1,494             | 204                | 234               |
| <i>Elingamita johnsonii</i>       | 86,619        | 18,095        | 25,733       | 34.8%             | 30.3%             | 43.1%             | 1,482             | -                  | 234               |
| <i>Embelia vestita</i>            | 87,046        | 18,012        | 26,090       | 34.7%             | 30.2%             | 42.9%             | 1,494             | 204                | 234               |
| <i>Myrsine africana</i>           | 86,156        | 18,369        | 25,954       | 34.8%             | 30.3%             | 43.0%             | 1,497             | 204                | 234               |
| <i>Myrsine sandwicensis</i>       | 85,891        | 18,221        | 26,086       | 34.8%             | 30.1%             | 42.9%             | 1,497             | 204                | 234               |
| <i>Myrsine stolonifera</i>        | 86,786        | 18,305        | 25,931       | 34.7%             | 30.3%             | 43.0%             | 1,497             | 204                | 234               |
| <i>Parathesis chiapensis</i>      | 86,416        | 18,432        | 25,909       | 34.8%             | 30.1%             | 43.0%             | 1,494             | -                  | 234               |
| <i>Parathesis donnell-smithii</i> | 86,106        | 18,440        | 25,899       | 34.8%             | 30.1%             | 43.0%             | 1,494             | -                  | 234               |
| <i>Tapeinosperma multiflorum</i>  | 85,803        | 18,289        | 25,538       | 34.9%             | 30.1%             | 43.1%             | 1,494             | -                  | 234               |
| <i>Tapeinosperma netor</i>        | 85,683        | 17,679        | 25,627       | 34.9%             | 30.3%             | 43.1%             | 1,494             | -                  | 234               |

**Table S2.** Seven shared cpSSR loci across all cp genomes within the Myrsinaceae s.str. clade.

| Repeat unit | Location                          |
|-------------|-----------------------------------|
| T           | <i>trnK</i> <sup>UUU</sup> intron |
| T           | <i>rpo2</i>                       |
| T           | <i>ndhC-trnC</i> <sup>ACA</sup>   |
| T           | <i>rpoB</i>                       |
| C           | <i>rps15</i>                      |
| AT          | <i>rpo2</i>                       |
| AATA        | <i>ndhD</i>                       |
